# Supplementary material
Source: PubMed Central journal article supplement (PMC2885001)
Supplement: NIHMS185911-supplement-1.pdf [file NIHMS185911-supplement-1.pdf]

## **Supplementary information Carvajal-Vergara X. *et al.***

### **Contents:**

Supplementary Figures (12):

1. LS-iPSC formation.
2. LS-iPSC lines are derived from their parental fibroblasts and maintain normal karyotypes.
3. *PTPN11* T468M mutation analysis in LS-iPSC and fibroblasts.
4. Retroviral transgenes integration in iPSC.
5. Retroviral transgenes silencing in iPSC lines.
6. LS-iPSC expressed markers common to pluripotent cells.
7. Gene expression analysis.
8. *In vitro* differentiation of iPSC lines.
9. LS-iPSC differentiate into hematopoietic cells.
10. Characterization of wt S3-iPS4 and L2-iPS10 cell lines.
11. Pluripotency of S3-iPS4 and L2-iPSC.
12. Disruption of MAPK activation upon bFGF stimulation in LS-iPSC.

Supplementary Table 1
